# Supplementary material for: Quantifying Global Tolerance of Biochemical Systems: Design Implications for Moiety-Transfer Cycles
Source: PLoS Comput Biol. 2009 Mar 20;5(3):e1000319. doi: 10.1371/journal.pcbi.1000319 (PMC2650413; doi:10.1371/journal.pcbi.1000319)
Supplement: Text S2 — Analysis of local performance (0.24 MB DOC) [file pcbi.1000319.s002.doc]

**Supporting Text S2**

## *Analysis of Local Performance*

## *Systemic Regime a*

In Table S1, we show, for each criterion, the analytical expression that applies in Systemic Regime ***a***. Since optimum local performance with respect to each criterion corresponds to the minimum possible value, we are able to differentiate each analytical expression and determine whether a parameter/variable should decrease or increase to improve performance.

As an illustration, we will consider Criterion *2*. In order to optimize performance based on Criterion *2*, , , and should decrease, whereas and should increase. However, the particular strategy of optimization with respect to and depends on Condition 1:

If Condition 1 is valid, then should increase and should decrease. On the other hand, if it is invalid, then should decrease and should increase. Furthermore, as was mentioned in the main text, if Condition 1 is valid, then optimization with respect to criteria *1* through *6* follows the same strategy.

**Table S1.** Evaluation of the Local Performance in Systemic Regime ***a***.

| ***Criterion*** | ***Capable***  ***of being fulfilled*** | ***Analytical Expression*** | ***Optimum value*** |
| --- | --- | --- | --- |
| *1* | + |  | 1 |
| *2* | + |  | 0 |
| *3* | + |  | 0 |
| *4* | + |  | 1 |
| *5* | + |  | 0 |
| *6* | + |  | 0 |
| *7* | + |  | 2 |

It should be mentioned that there is one apparent conflict while trying to optimize performance with respect to all criteria. According to Criterion *7*, and should

decrease while and should increase. However, according to criteria *1*, *2* and *6* should decrease. This conflict is merely apparent because it can be readily resolved with appropriate values for , or (for which there are no trade-offs).

## *Systemic Regime b*

In Table S2, we present the results from the analysis of local performance in Systemic Regime ***b***. Criteria *4* and *5* cannot be fulfilled in Systemic Regime ***b*** because the equation that governs the steady state does not depend on the concentration of

**Table S2.** Evaluation of the Local Performance in Systemic Regime ***b***.

| ***Criterion*** | ***Capable of being fulfilled*** | ***Analytical Expression*** | ***Optimum value*** | ***Parameters/variables***  ***that correlate*** | |
| --- | --- | --- | --- | --- | --- |
| **negatively** | **positively** |
| *1* | + |  | 3 |  |  |
| *2* | + | 0 | 0 | ---* | --- |
| *3* | + |  | 0 |  |  |
| *4* | - | + | NA† | NA | NA |
| *5* | - | NA | NA | NA | NA |
| *6* | + |  | 0 |  |  |
| *7* | + | 2 | 2 | --- | --- |

* The optimum value does not depend on the values of the parameters and independent variables.

† NA – Not applicable

moiety-acceptor (see Table 1 of the manuscript). Hence, the supply of charged carrier will not respond to changes in the concentration of moiety-acceptor (Criterion *4*). It also becomes inconsequential to address how fluctuations in the values of the structural parameters and independent variables affect the sensitivity of to (Criterion *5*). Systemic Regime ***b*** has a fast response time (Criterion *6*), but not with respect to changes in . Therefore, the importance of this responsiveness becomes questionable.

It is also worth mentioning that criteria *2* and *7* are capable of being fulfilled in Systemic Regime ***b*** and that this does not depend on any particular optimization strategy

## *Systemic Regime c*

In Table S3, we present the results from the analysis of local performance in Systemic Regime ***c***. As in Systemic Regime ***b***,criteria *4* and *5* cannot be fulfilled in Systemic Regime ***c***. In addition, even though Systemic Regime ***c*** can have a fast response time (Criterion *6*), it will not be with respect to changes in . Therefore, as in Systemic Regime ***b***, the importance of this responsiveness becomes questionable.

All criteria are capable of being optimized with high values for and low values for and provided Condition 2 [Eqn. (S2)] is valid.

However, if Condition 2 is invalid, then this optimization strategy will degrade the performance of Criterion *7*.

**Table S3.** Evaluation of the Local Performance in Systemic Regime ***c***.

| ***Criterion*** | ***Capable of being fulfilled*** | ***Analytical Expression*** | ***Optimum value*** | ***Parameters/variables***  ***that correlate*** | |
| --- | --- | --- | --- | --- | --- |
| **negatively** | **positively** |
| *1* | + |  | 3 |  |  |
| *2* | + | 0 | 0 | ---‡ | --- |
| *3* | + |  | 0 |  |  |
| *4* | - | + | NA§ | NA | NA |
| *5* | - | NA | NA | NA | NA |
| *6* | + |  | 0 |  |  |
| *7* | + |  | 2 |  |  |

* Condition 3 () true; † Condition 3 false; ‡ The optimum value does not depend on the values of the parameters and independent variables; § NA – Not applicable; ¶ Condition 2 () true; || Condition 2 false.

Furthermore, several other trade-offs exist:

• In order to optimize local performance according to criteria *1* and *3*, should tend to low values and should tend to high values. However, the opposite is true for optimizing criteria *6* and *7*

• To improve criteria *1*, *3* and *6*, should tend to high values, while to improve Criterion *7*, should tend to low values.

Finally, the optimum value of Criterion *1* in Systemic Regime ***c*** is 1, whereas that in Systemic Regime ***b*** is 3. Therefore, since Systemic Regimes ***b*** and ***c*** share the same optimum values for the remaining criteria, we conclude that overall local performance in Systemic Regime ***c*** is better than that in Systemic Regime ***b***.
